# Supplementary material for: Poly(ε-caprolactone)-based shape memory polymers crosslinked by polyhedral oligomeric silsesquioxane
Source: Royal Society of Chemistry journal article supplement (doi:10.1039/c6ra20431g), 2016-01-01
Supplement: c6ra20431g1.pdf [file c6ra20431g1.pdf]

# Poly ( $\epsilon$ -caprolactone)-based Shape Memory Polymers Crosslinked by Polyhedral Oligomeric Silsequioxane

Cite this: DOI: 10.1039/x0xx00000x

Received 00th January 2016,  
Accepted 00th January 2016

Pengfei Yang<sup>a</sup>, Guangming Zhu<sup>a\*</sup>, Xuelin Shen<sup>a</sup>, Xiaogang Yan<sup>a</sup>, Jing Nie<sup>a</sup>

DOI: 10.1039/x0xx00000x

www.rsc.org/

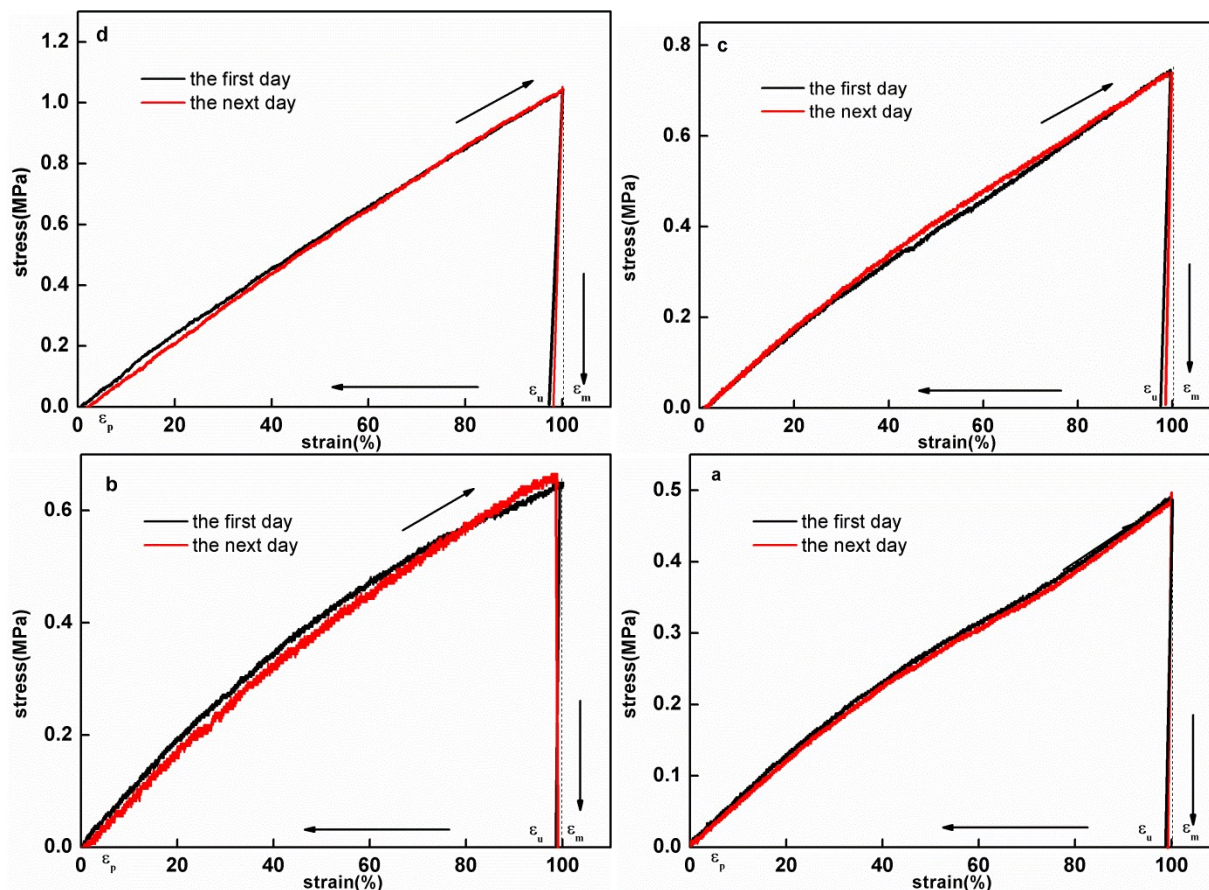

**Fig. S1** Comparison of cyclic tensile behavior of POSS-PCL networks in two different times: (a) POSS-N2000, (b) POSS-N4000, (c) POSS-N5000, (d) POSS-N6000. Black line shows the shape memory properties in the first day, while the red line stand for the repeated experiment after one day.
